# Supplementary material
Source: publisher site journal article supplement (http://kjim.org/upload/media/kjim-2023-222-Supplementary-Fig-2.pdf)
Supplement: Supplementary file 1 [file kjim-2023-222-Supplementary-Fig-2.pdf]

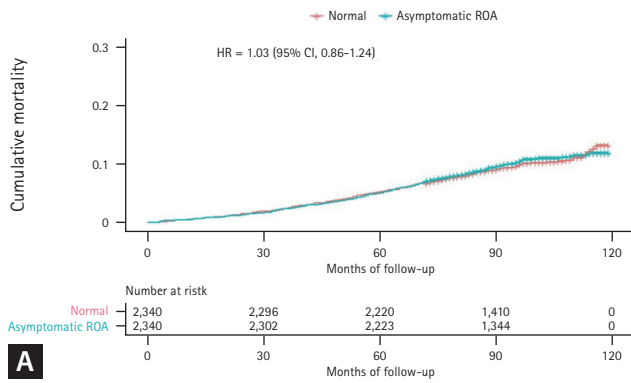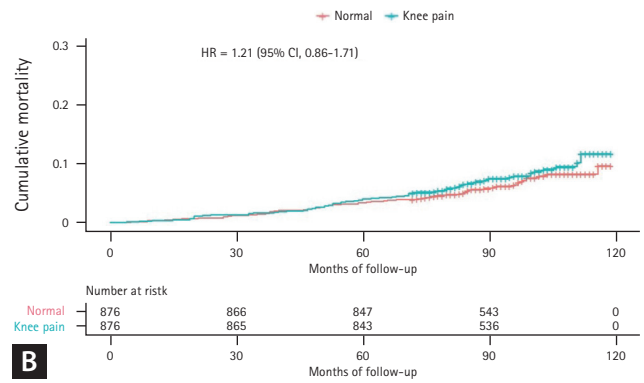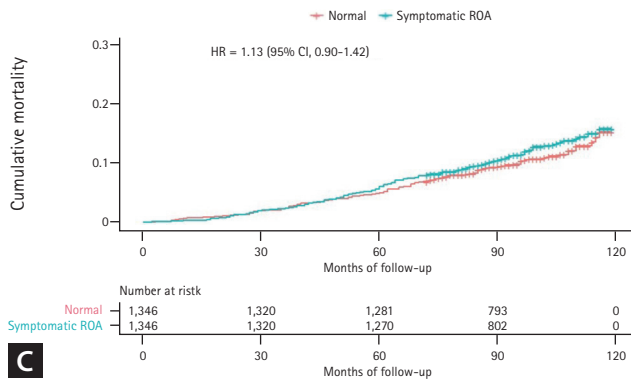

**Supplementary Figure 2.** Kaplan–Meier plot of cumulative mortality from all-cause up to ten years for propensity score-matched participants with (A) asymptomatic ROA, (B) knee pain (in the absence of ROA), and (C) symptomatic ROA. CI, confidence interval; HR, hazard ratio; ROA, radiographic knee osteoarthritis.
